# Supplementary material for: 到2012年，福建旅游总收入达2000亿 海西将成“世界级旅游目的地”
Source: Royal Society of Chemistry journal article supplement (doi:10.1039/c8an01238e), 2009-01-01
Supplement: c8an01238e1.pdf [file c8an01238e1.pdf]

**Electronic Supplementary Information**

**Colorimetric chemosensor for heptanal with selectivity over formaldehyde  
and acetaldehyde through synergistic interaction of hydrophobic interactions  
and oxime formation**

Jinyoung Oh, Seungyoon Kang, Cheol Gyu Lee, and Min Su Han\*

*Department of Chemistry, Gwangju Institute of Science and Technology (GIST), Gwangju  
61005, Republic of Korea*

*E-mail: happyhan@gist.ac.kr (M. S. Han); Fax: +82-62-715-2866; Tel: +82-62-715-2848*

## Determination of the optimal ratio of DA-A and DA-B

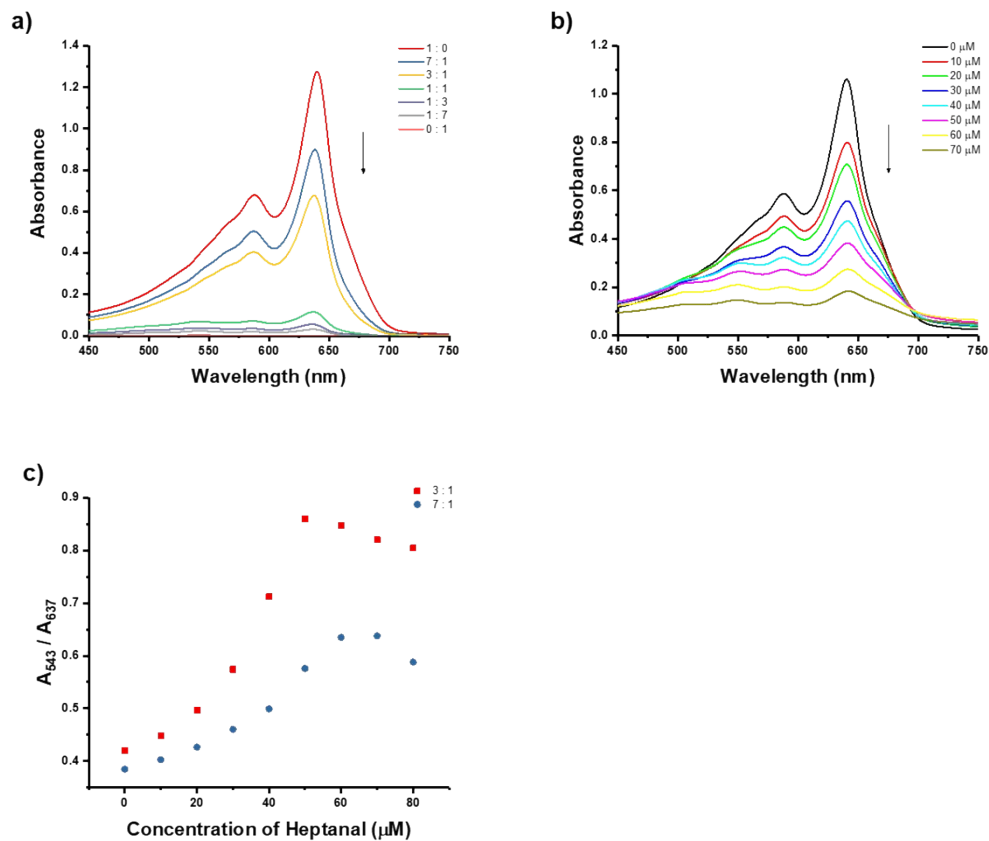

**Fig. S1** a) UV-Vis spectra of PDA liposomes (100 μM) composed with various ratio of **DA-A** and **DA-B** (1:0, 7:1, 3:1, 1:1, 1:3, 1:7, and 0:1) in the acetate buffer (20 mM, pH 4.0); b) UV-Vis spectra obtained 2 h after the addition of heptanal solutions (0, 10, 20, 30, 40, 50, 60, and 70 μM in 0.1 % MeOH) to the acetate buffer (20 mM, pH 4.0) containing PDA liposomes (100 μM) composed with 1:0 ratio of **DA-A** and **DA-B**; c) Plot of the absorbance ratio at 543 and 637 nm in PDA liposomes (100 μM) composed with 3:1 and 7:1 ratio of **DA-A** and **DA-B** versus heptanal concentrations.

## Investigation of temperature parameter in PDA liposome

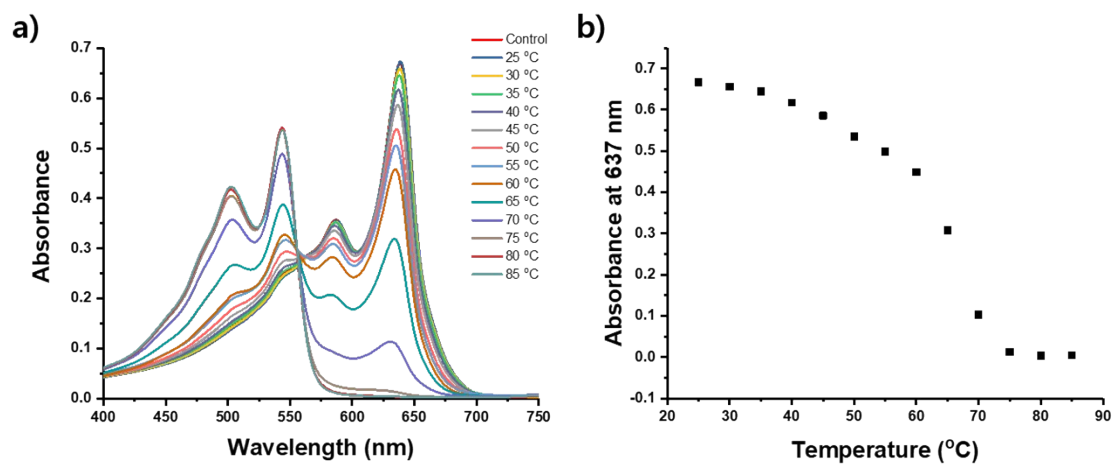

**Fig. S2** a) UV-Vis spectra of PDA liposomes (100  $\mu\text{M}$ ) in acetate buffer (20 mM, pH 4.0) obtained after incubation for 20 min at various temperatures; b) Plot of absorbance at 637 nm for various temperatures.

### Estimation of limit of detection for heptanal using PDA liposome

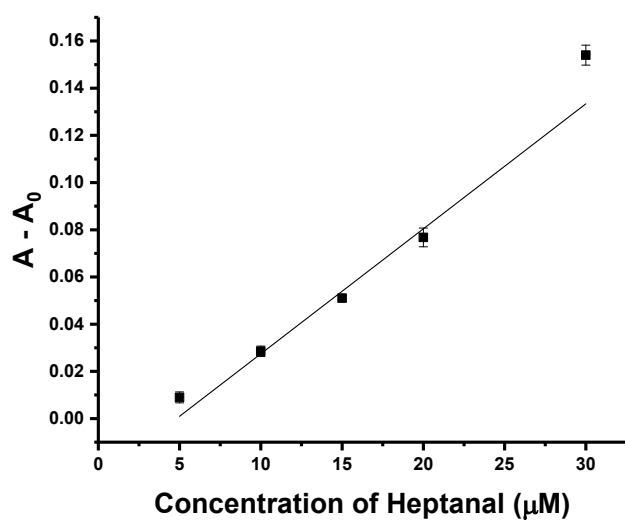

**Fig. S3** Plot of absorbance ratio at 543 and 637 nm against heptanal concentrations (5, 10, 15, 20, and 30  $\mu\text{M}$  in 0.1 % MeOH) where A and  $A_0$  means absorbance ratio at 543 and 637 nm in the presence and absence of heptanal, respectively.

Intercept = -0.0255

Slope = 0.0053

$R^2 = 0.9436$

Limit of detection (LOD) = 4.8  $\mu\text{M}$

## Dynamic light scattering (DLS) of PDA liposome

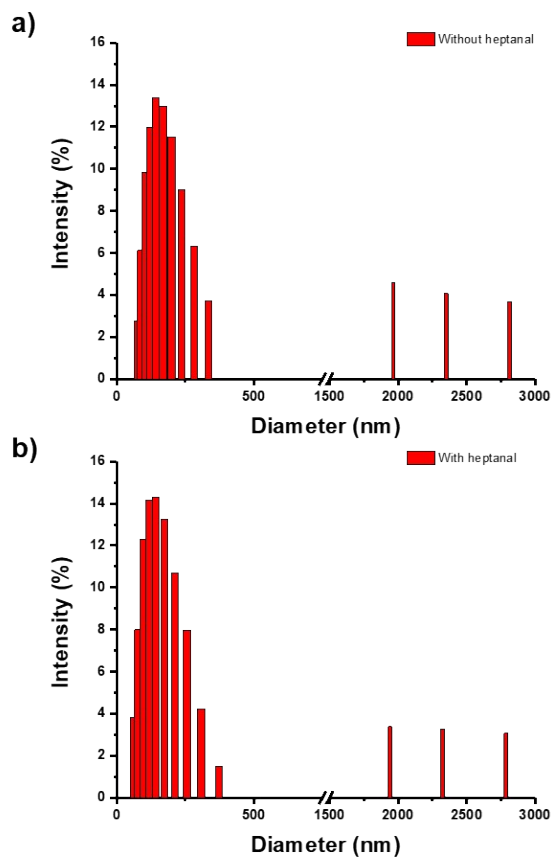

**Fig. S4** The size distribution of PDA liposomes (100  $\mu\text{M}$ ) obtained after 2h incubation in the a) absence and b) presence of heptanal (50  $\mu\text{M}$  in 0.1 % MeOH).

## Raman spectra of PDA liposome

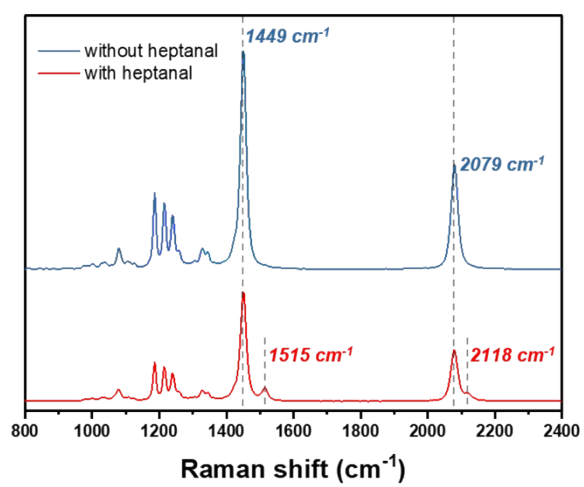

**Fig. S5** Raman spectra of PDA liposomes (500  $\mu\text{M}$ ) 2h after incubation in the absence and presence of heptanal (250  $\mu\text{M}$ ).

### Selectivity test for mimic serum

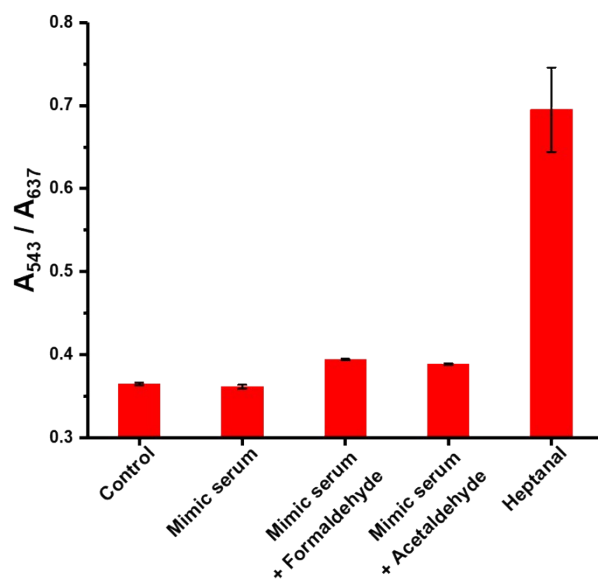

**Fig. S6** Plot of the absorbance ratio at 543 and 637 nm obtained 2 h after the addition of mimic serum (combination of glucose, urea, proline, and NaCl, 500  $\mu$ M), mimic serum with aldehydes (formaldehyde and acetaldehyde, 500  $\mu$ M), and heptanal (50  $\mu$ M) to the acetate buffer containing the PDA liposomes (100  $\mu$ M).

## Characterization of compounds

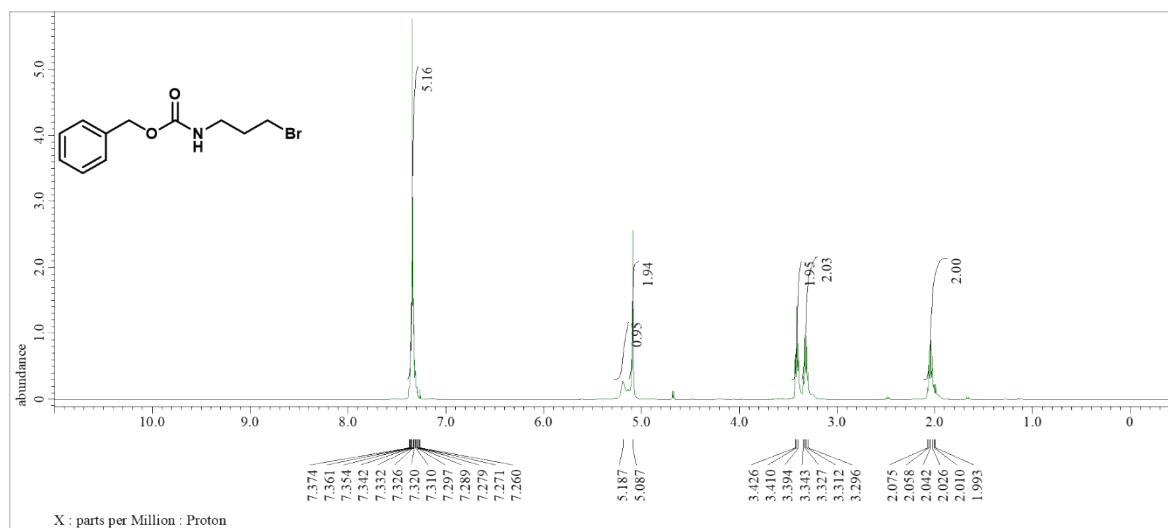

Fig. S7 <sup>1</sup>H-NMR spectrum of compound 7 in CDCl<sub>3</sub>.

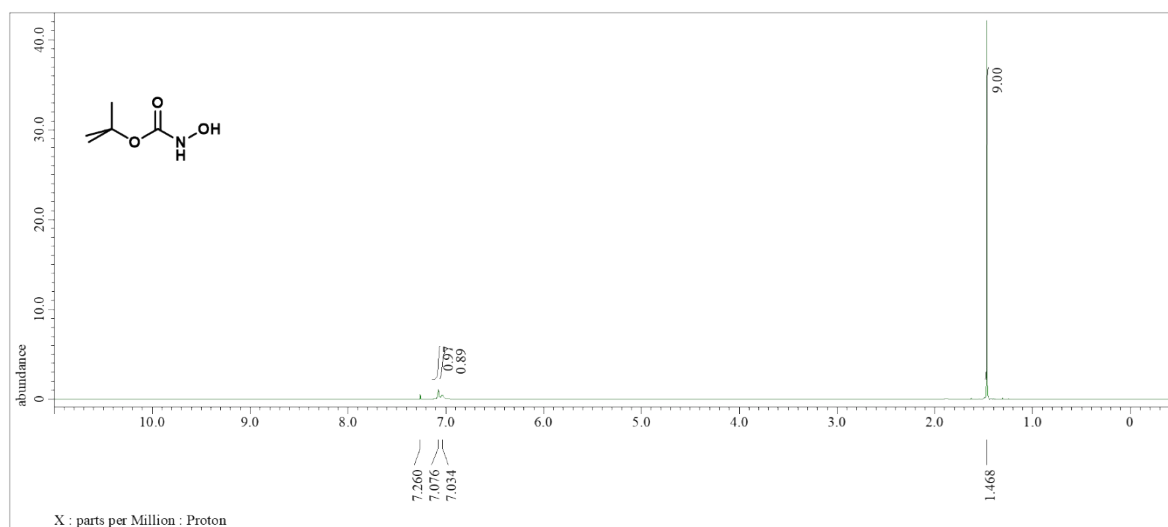

Fig. S8 <sup>1</sup>H-NMR spectrum of compound 6 in CDCl<sub>3</sub>.



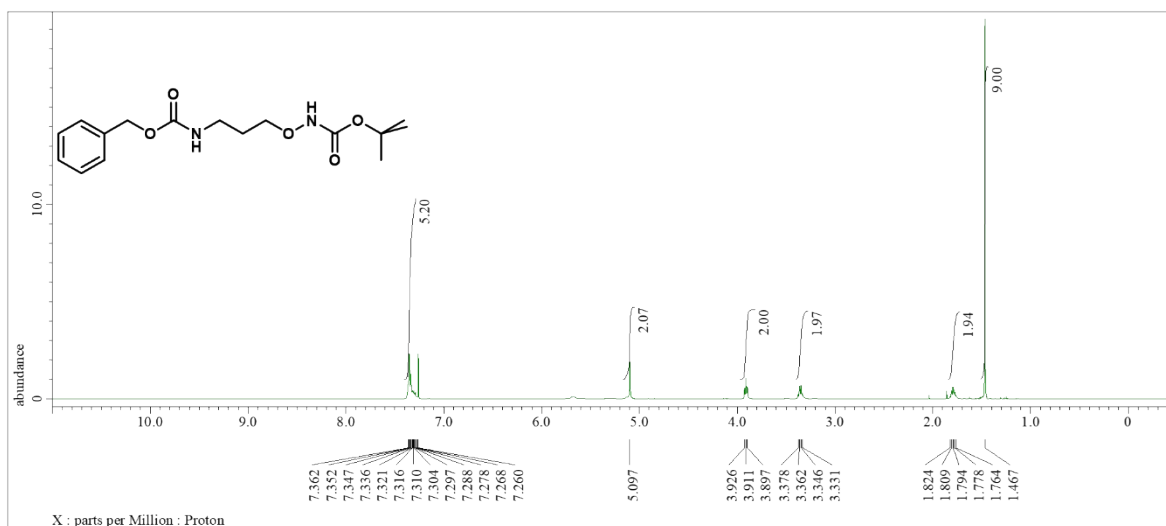

Fig. S9  $^1\text{H-NMR}$  spectrum of compound 5 in  $\text{CDCl}_3$ .

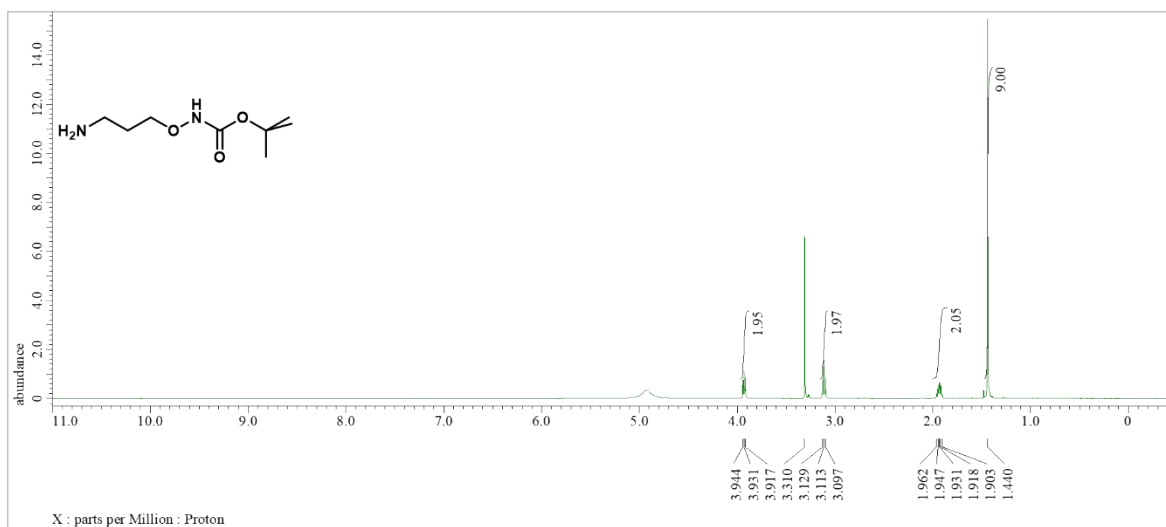

Fig. S10  $^1\text{H-NMR}$  spectrum of compound 4 in  $\text{CD}_3\text{OD}$ .

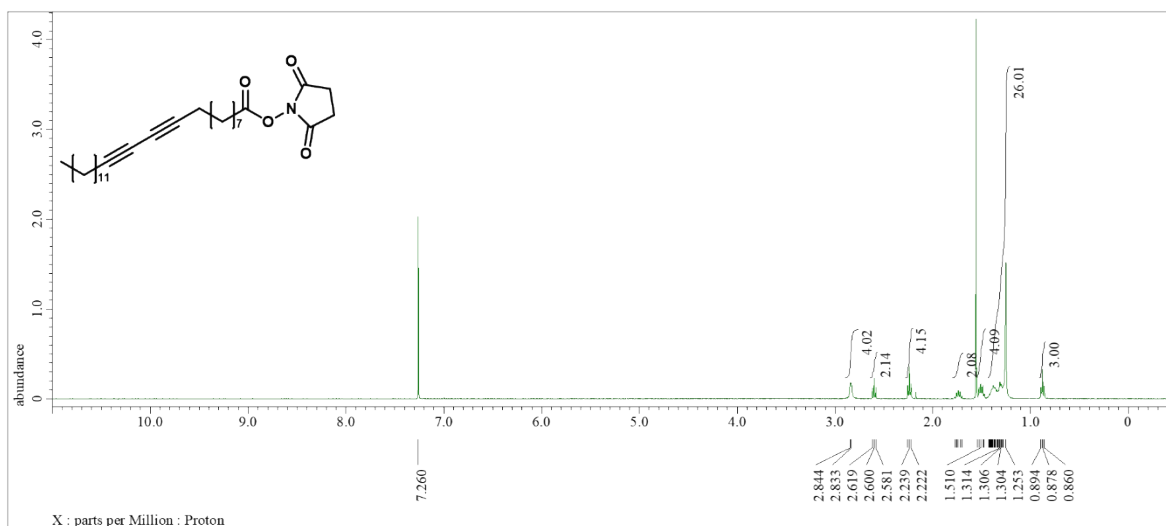

Fig. S11  $^1\text{H-NMR}$  spectrum of compound **3** in  $\text{CDCl}_3$

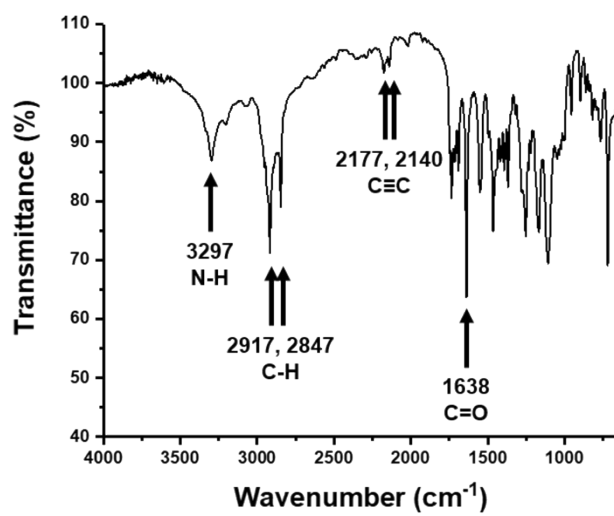

Fig. S12 FT-IR spectrum of compound **2**

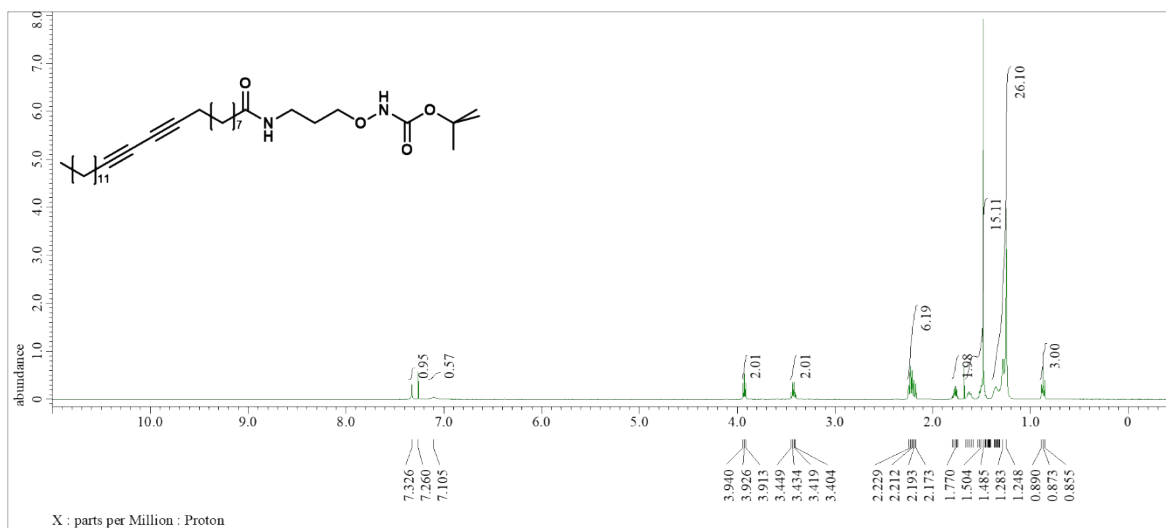

Fig. S13  $^1\text{H}$ -NMR spectrum of compound **2** in  $\text{CDCl}_3$

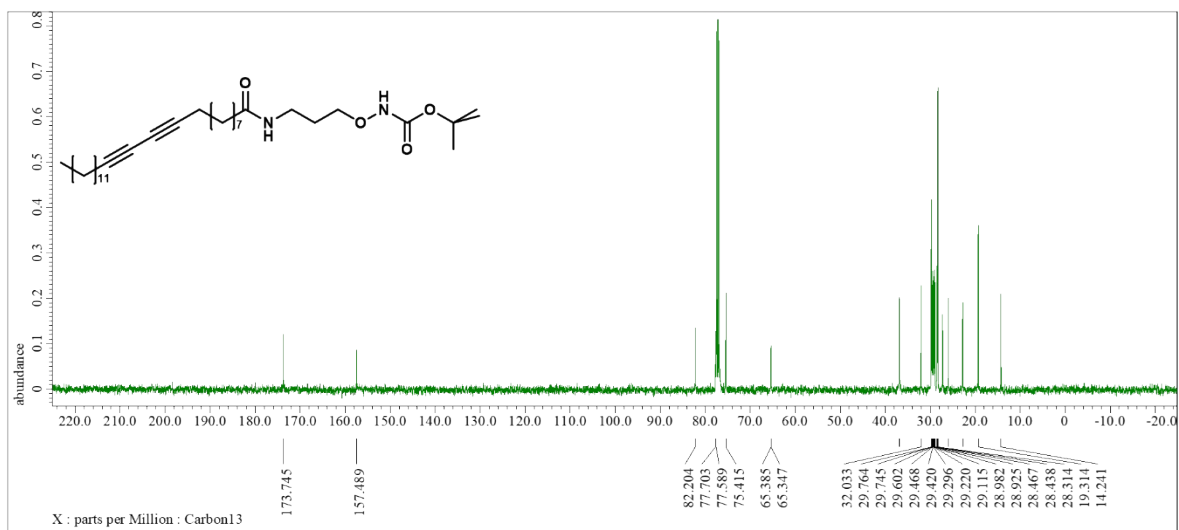

Fig. S14  $^{13}\text{C}$ -NMR spectrum of compound **2** in  $\text{CDCl}_3$

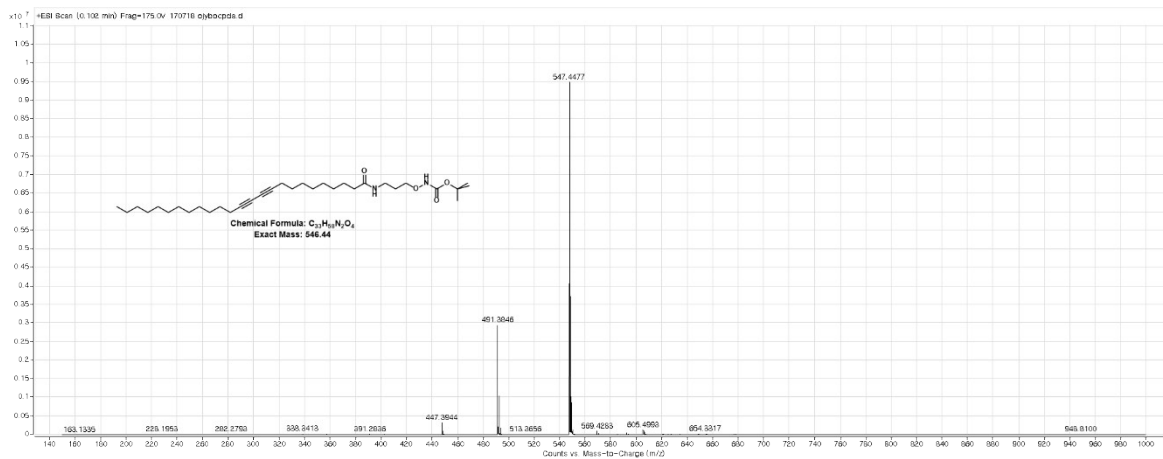

Fig. S15 ESI-MS spectrum of compound 2

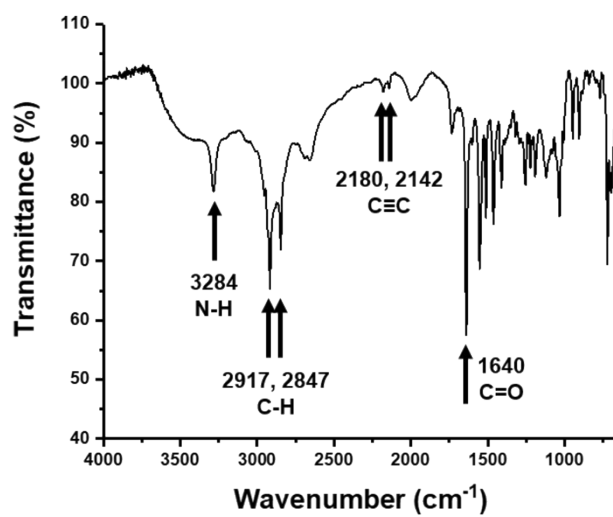

Fig. S16 FT-IR spectrum of compound DA-A

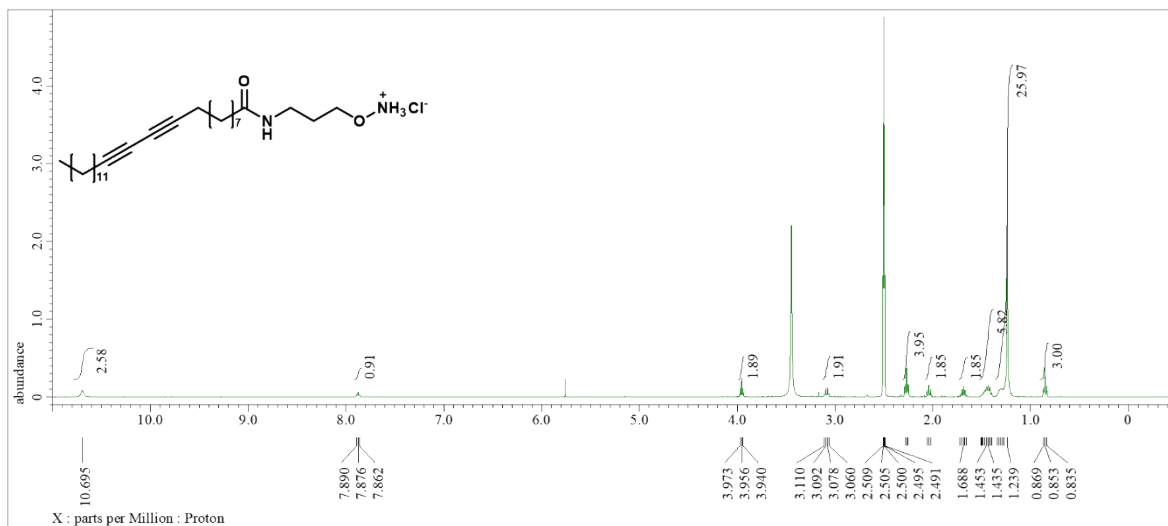

Fig. S17 <sup>1</sup>H-NMR spectrum of compound DA-A in DMSO-d<sub>6</sub>

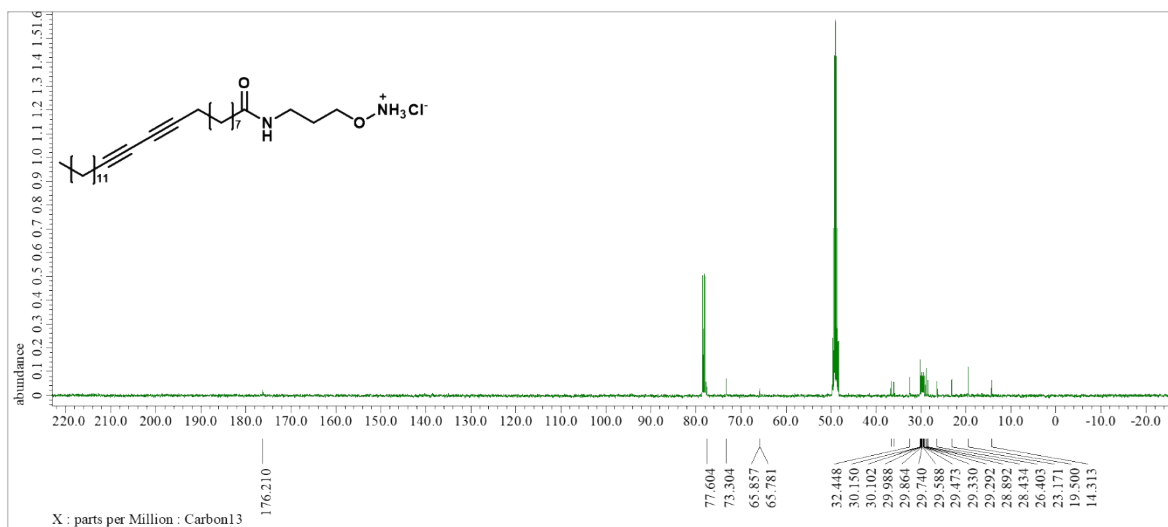

Fig. S18 <sup>13</sup>C-NMR spectrum of compound DA-A in DMSO-d<sub>6</sub> : CDCl<sub>3</sub> = 1 : 1

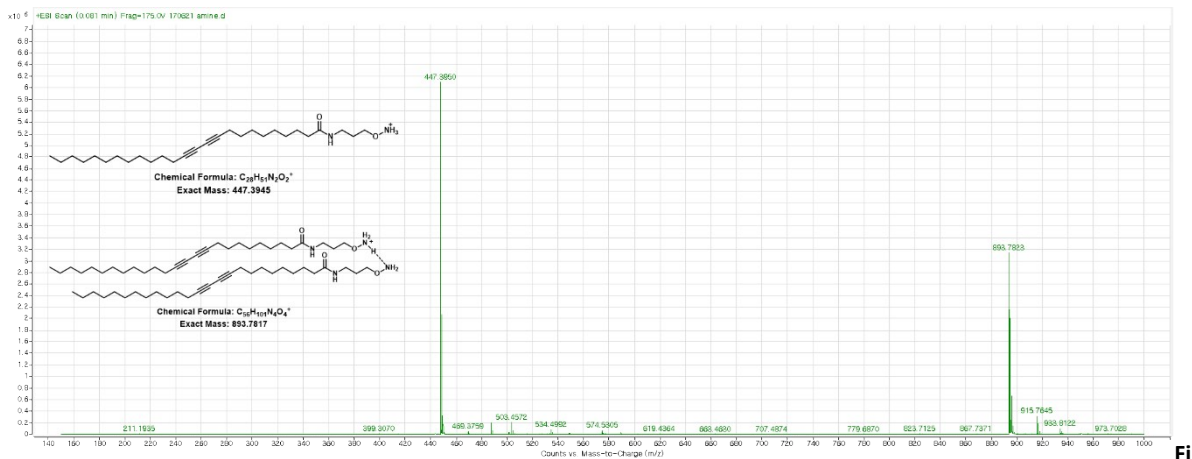

g. S19 ESI-MS spectrum of compound DA-A

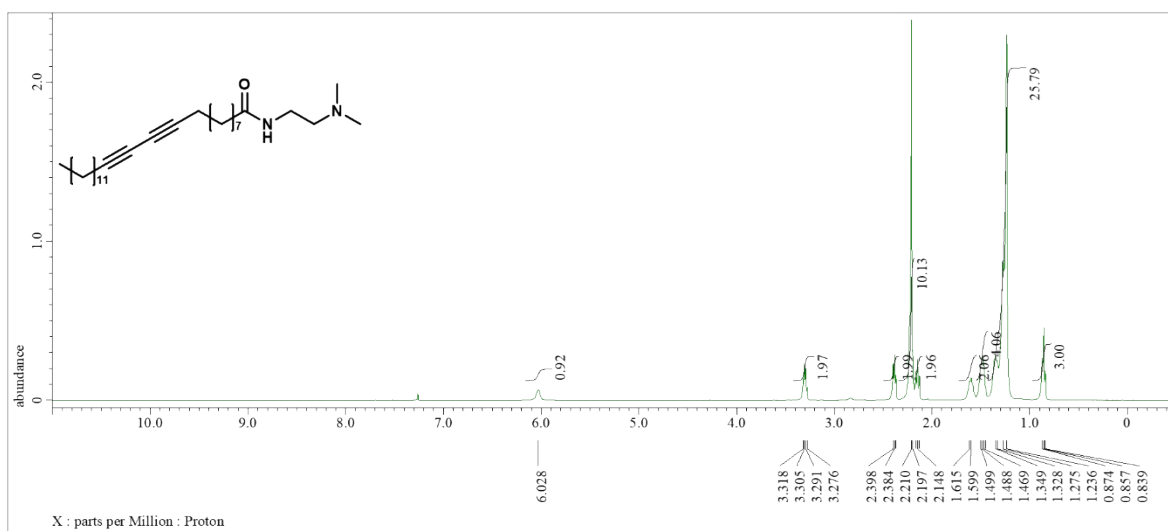

Fig. S20 <sup>1</sup>H-NMR spectrum of compound 9 in CDCl<sub>3</sub>

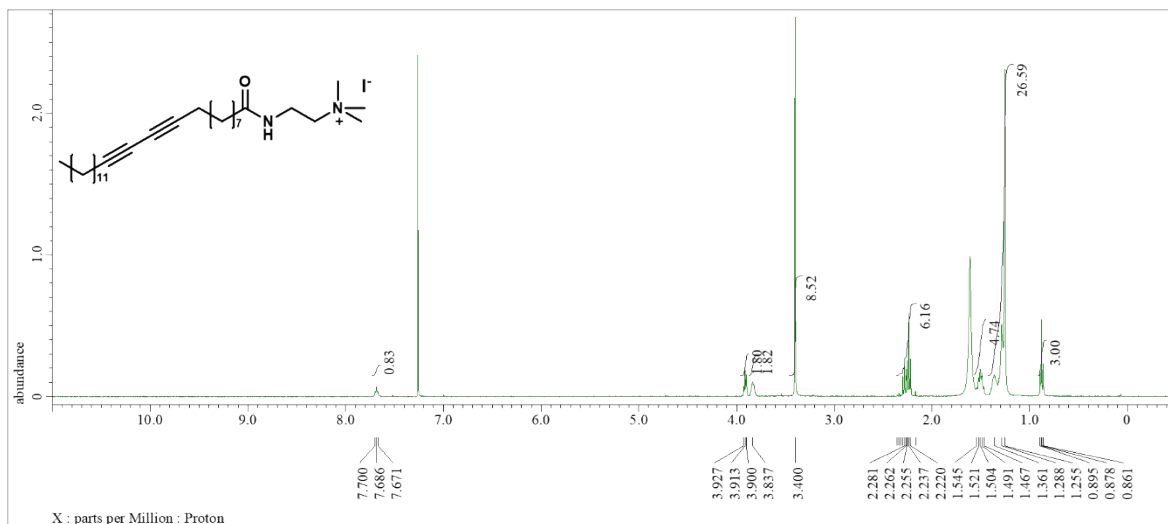

Fi

g. S21  $^1\text{H-NMR}$  spectrum of compound DA-B in  $\text{CDCl}_3$
